# Supplementary material for: Enhanced S2 emission in carbazole-based ionic liquids
Source: Royal Society of Chemistry journal article supplement (doi:10.1039/c4ra12362j), 2015-01-01
Supplement: c4ra12362j1.pdf [file c4ra12362j1.pdf]

## Supporting information

### Enhanced S<sub>2</sub> Emission in Carbazole-Based Ionic Liquids

*Noureen Siraj,<sup>†</sup> Susmita Das,<sup>†</sup> Farhana Hasan,<sup>†</sup> Chengfei Lu<sup>†</sup>, Lucy W. Kiruri,<sup>†</sup> Karen E. Steege*

*Gall,<sup>‡</sup> and Isiah M. Warner<sup>\*†</sup>*

#### **Carbazoleimidazolium trifluoromethanesulfonate [CI][OTf]**

Carbazoleimidazoliium iodide (CII) ( 0.5 g, 1 mmol) was dissolve in dichloromethane (DCM). A saturated solution of sodium trifluoromethanesulfonate ( 0.19 g, 1.3 mmol) was prepared in water. These two solution were mixed together to perform anion exchange reaction in a biphasic solution. The biphasic solution of DCM and water was stirred for 3-4 days. After 4 days, the lower layer of DCM was separated from water and washed with water several times to remove the by-product ( sodium salt of iodide) which was highly soluble in water. DCM was evaporated under high vacuum. After removing DCM, sample was freeze-dried to remove small amounts of water. The product was obtained as yellow solid (0.48 g, 93 % yield).

<sup>1</sup>H-NMR (CDCl<sub>3</sub>, 400 MHz): Carbazoleimidazolium cation: δ 9.72 (s, 1H), 8.57 (d, J=2.16 Hz, 1H), 8.19 (d, J= 7.6Hz, 1H), 7.95- 7.77 (m, 2H),7.65 (m, 1H), 7.29 (t, 1H), 4.35 (s, 3H), 3.96 (m, 2H), 1.99 (m, 4H), 1.31-1.16 (m,6H), 0.84-0.76 (m, 6H); <sup>19</sup>F-NMR: (CDCl<sub>3</sub>, 250 MHz) Trifluoromethanesulfonate: δ -79.22. (MS, ESI<sup>+</sup>) m/z 360, (MS, ESI<sup>-</sup>) m/z 149

#### **Carbazoleimidazolium bis(trifluoromethylsulfonyl)imide [CI][NTf<sub>2</sub>]**

Carbazoleimidazoliium iodide (CII) (0.1 g, 0.21 mmol) was anion exchanged with LiNTf<sub>2</sub> (0.07 g, 0.24 mmol) followed the same procedure as described above. The product was obtained as yellow viscous jelly like liquid (0.1g, 76 % yield).

<sup>1</sup>H-NMR (CDCl<sub>3</sub>, 400 MHz): Carbazoleimidazolium cation δ 9.90 (s, 1H), 8.34 (d, J=1.96Hz, 1H),8.19 (d, J= 7.8Hz, 1H), 7.62- 7.56 (m, 2H), 7.54-7.52 (m, 3H), 7.47 (d, J= 8.28 Hz, 1H), 7.32 (t, 1H), 4.22 (s, 3H), 2.34 (m,2H), 1.40 (m, 4H), 1.28-1.26 (m, 6H), 0.95-0.85 (m, 6H).

<sup>19</sup>F-NMR: (CDCl<sub>3</sub>, 250 MHz): bis(trifluoromethylsulfonyl)imide: δ -78.78 (MS, ESI<sup>+</sup>) m/z 360, (MS, ESI<sup>-</sup>) m/z 280

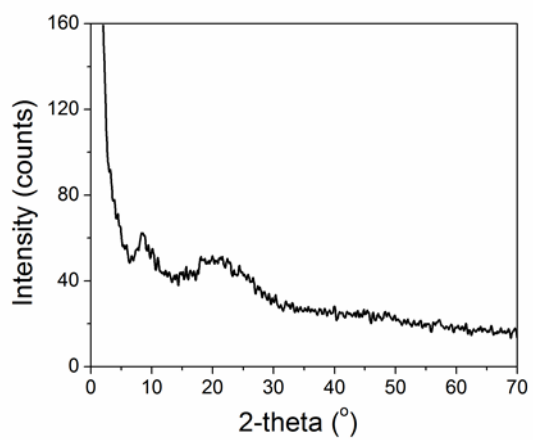

**Fig. S1** XRD for [Cl][NTf<sub>2</sub>]

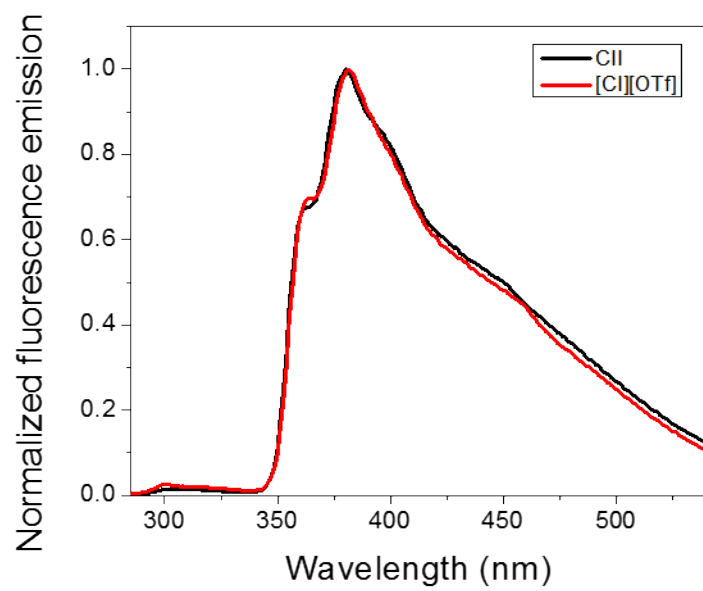

**Fig. S2** Normalized fluorescence emission spectra of ClI and [Cl][OTf] in THF,  $\lambda_{\text{ex}}$  275 nm.

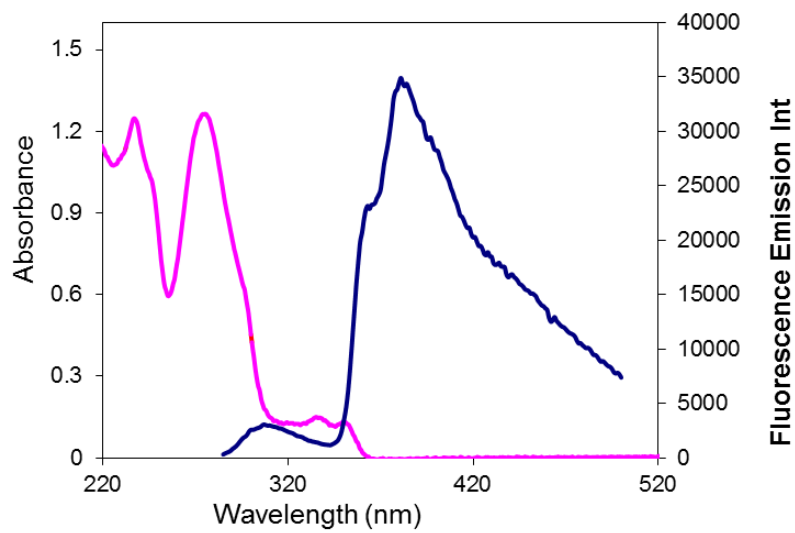

**Fig. S3** Fluorescence emission (blue) and absorption (pink) spectra of 3  $\mu\text{M}$  solution of  $[\text{Cl}][\text{NTf}_2]$  ionic liquid in THF.
